# Supplementary material
Source: PubMed Central journal article supplement (PMC6153817)
Supplement: zac009187483s1.pdf [file zac009187483s1.pdf]

**SUPPLEMENTARY FIGURE 1.**

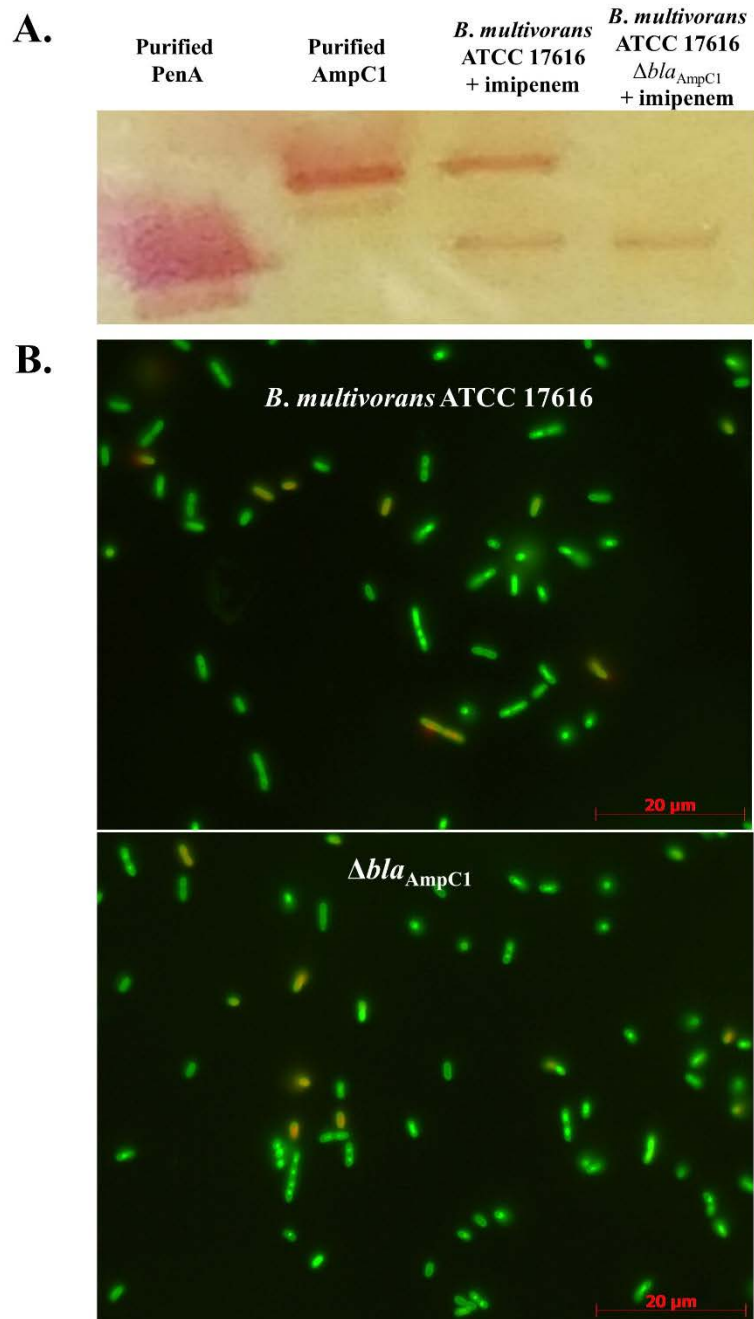

**SUPPLEMENTARY FIGURE 1 A.** aIEF gel overlaid with nitrocefin confirms the lack of production of active AmpC1 in the *B. multivorans* ATCC 17616  $\Delta bla_{AmpC1}$  strain. **B.** LIVE/DEAD staining of *B. multivorans* ATCC 17616 and the *B. multivorans* ATCC 17616  $\Delta bla_{AmpC1}$  strains.

**SUPPLEMENTARY FIGURE 2.**

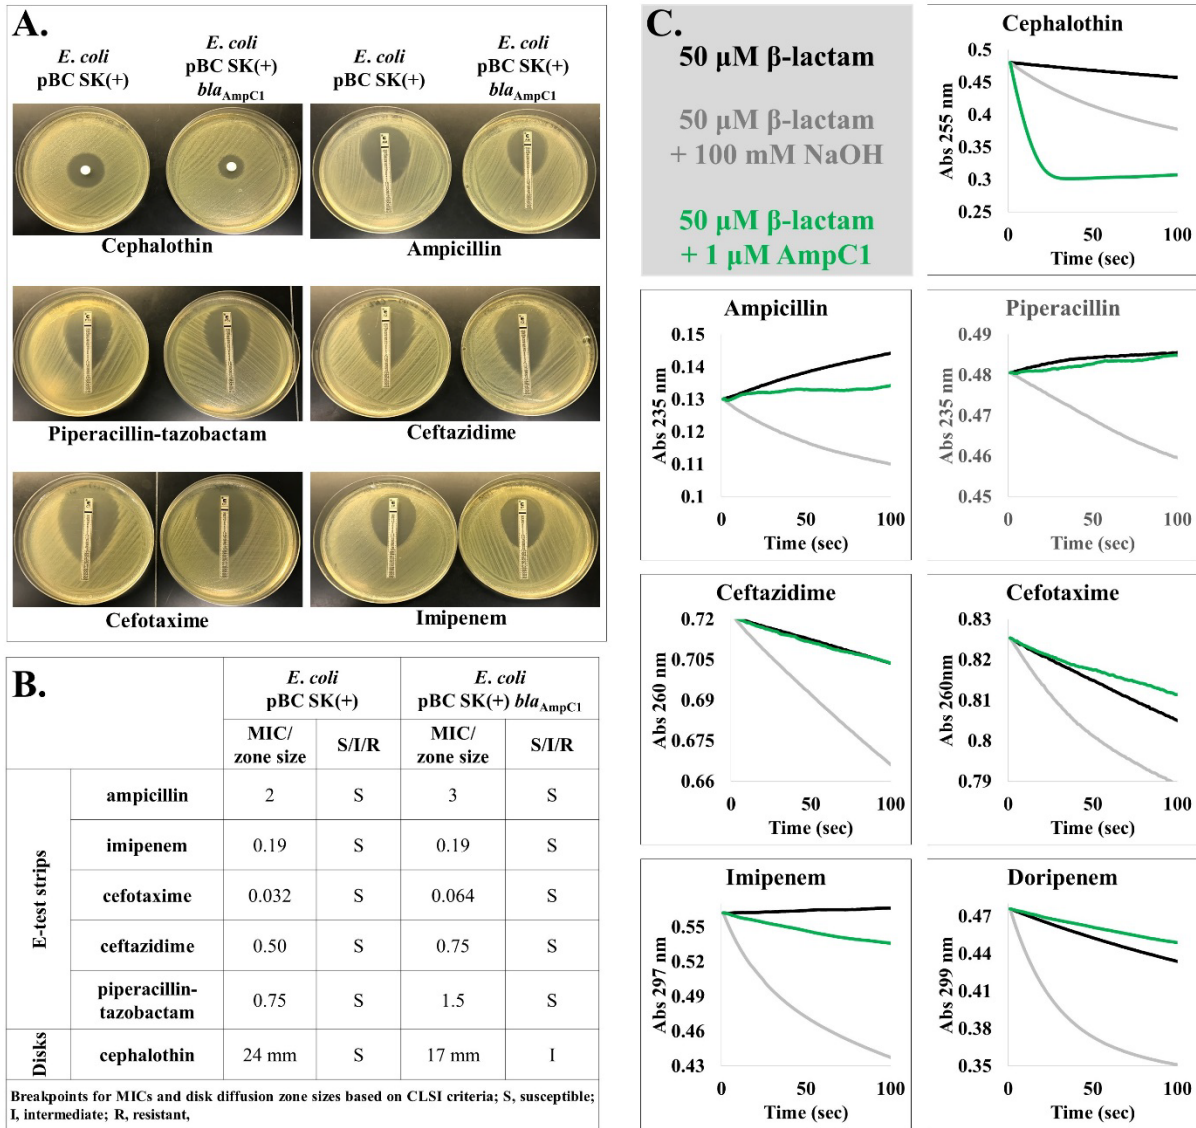

**SUPPLEMENTARY FIGURE 2. A.** Pictures of disk assays and/or E-test MICs on MH agar plates comparing *E. coli* DH10B pBC SK(+) to *E. coli* DH10B pBC SK(+) *bla*<sub>AmpC1</sub>. **B.** Summary of disk assay and E-test MIC results depicted in A. **C.** Hydrolysis curves using the purified AmpC1  $\beta$ -lactamase (green) with different  $\beta$ -lactams;  $\beta$ -lactam alone (black) and  $\beta$ -lactam with 100 mM sodium hydroxide (NaOH) (gray) were used as controls.
